# Supplementary material for: NHS-IL2 combined with radiotherapy: preclinical rationale and phase Ib trial results in metastatic non-small cell lung cancer following first-line chemotherapy
Source: Springer Nature journal article supplement (doi:10.1186/s12967-015-0397-0), 2015-01-01

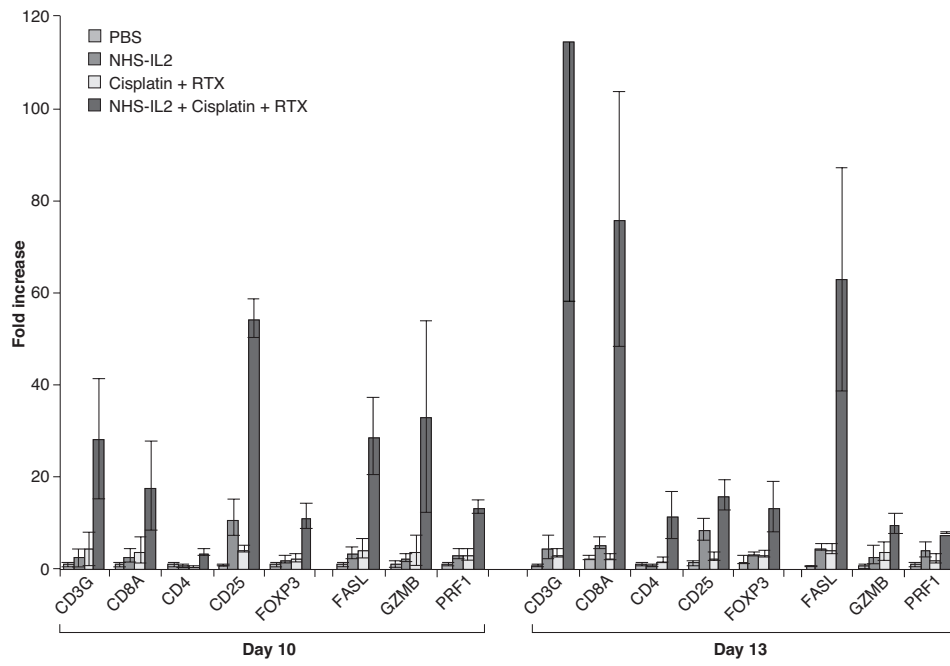

Supplement: MOESM1 [file 9766650]
